# Supplementary material for: Pomegranate activates TFEB to promote autophagy-lysosomal fitness and mitophagy
Source: PubMed Central journal article supplement (PMC6346015; doi:10.1038/s41598-018-37400-1), 2019-01-24
Supplement: 41598_2018_37400_MOESM1_ESM.pdf [file 41598_2018_37400_MOESM1_ESM.pdf]

**Pomegranate activates TFEB to promote autophagy-lysosomal  
fitness and mitophagy**

Sijie Tan<sup>1</sup>, Chye Yun Yu<sup>1</sup>, Zhi Wei Sim<sup>1</sup>, Zun Siong Low<sup>1</sup>, Brianna  
Lee<sup>1</sup>, Faith See<sup>1</sup>, Nyo Min<sup>2</sup>, Archana Gautam<sup>3</sup>, Justin Jang Hann  
Chu<sup>2</sup>, Kee Woei Ng<sup>3</sup> and Esther Wong<sup>1\*</sup>

**Content:**

This file contains the Supplementary Figures S1-11 and the  
accompanying figure legends.

# Supplementary Figure S1

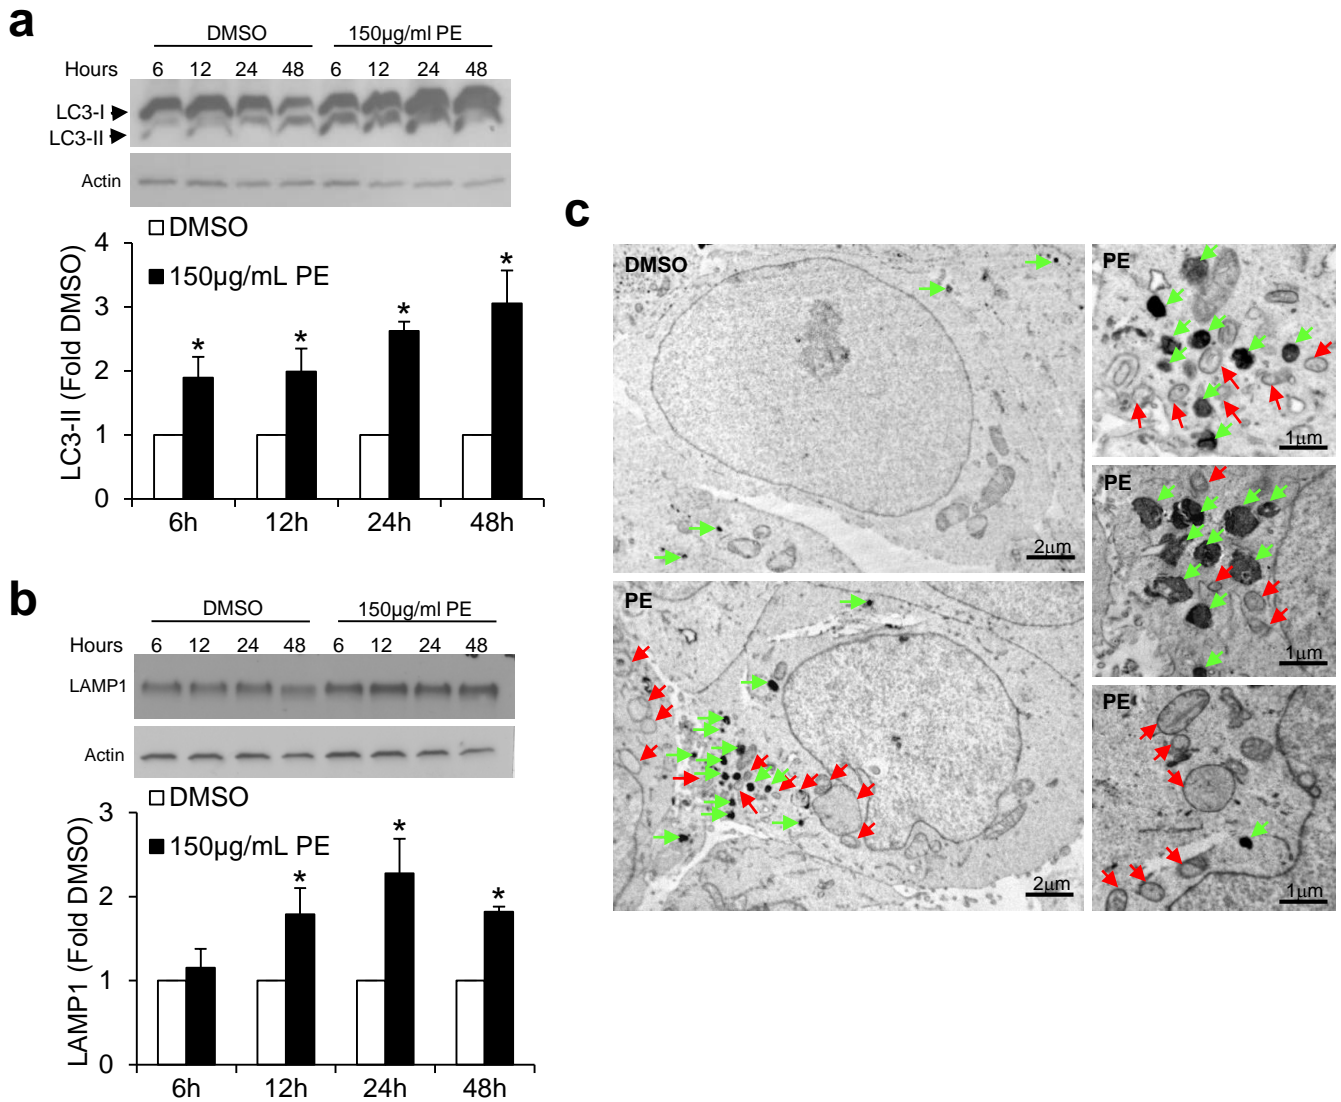

**Supplementary Figure S1: PE upregulates autophagosomal and lysosomal compartments.** (a-b) Top: Immunoblots of LC3 (a) and LAMP1 (b) in SY5Y cells treated with vehicle control DMSO and 150µg/ml PE for 6h, 12h, 24h and 48h. Bottom: Quantification of LC3-II and LAMP1 levels, calculated as fold change against DMSO control. All values are mean + S.E.M (n=3). Differences against DMSO control are significant at \* $p < 0.05$ . (c) Electron micrographs of SY5Y cells treated with DMSO or 150µg/ml PE for 24h under basal condition. Higher magnification fields show autophagic vacuoles (red arrows) and electron dense lysosomes (green arrows).

**Supplementary Figure S2**

| <b>Gene Symbol</b> | <b>Fold Increase</b> |
|--------------------|----------------------|
| AKT1               | -0.49885             |
| AMBRA1             | 2.034248 *           |
| APP                | -0.19742             |
| ATG10              | 0.441079             |
| ATG12              | 3.196264 *           |
| ATG16L1            | 2.615564             |
| ATG16L2            | 0.781141             |
| ATG3               | 1.928958 *           |
| ATG4A              | 1.886893 *           |
| ATG4B              | 1.92071 *            |
| ATG4C              | -0.62582 *           |
| ATG4D              | 4.080788             |
| ATG5               | 2.193737             |
| ATG7               | 1.673394             |
| ATG9A              | 2.460342             |
| ATG9B              | 3.271276             |
| BAD                | 3.094935             |
| BAK1               | 4.402007 *           |
| BAX                | 1.651264             |
| BCL2               | 2.865425*            |
| BCL2L1             | 2.581412             |
| BECN1              | 2.169702 *           |
| BID                | 2.170097             |
| BNIP3              | 6.982535 *           |
| CASP3              | 2.159032             |
| CASP8              | 2.5551               |
| CDKN1B             | 1.583403             |
| CDKN2A             | 1.800029 *           |
| CLN3               | 1.49709 *            |
| CTSB               | 2.489029             |
| CTSD               | 1.34532 *            |
| CTSS               | 0.585348             |
| CXCR4              | 0.084326             |
| DAPK1              | 1.613234 *           |
| DRAM1              | 2.20426 *            |
| DRAM2              | 1.769037 *           |
| EIF2AK3            | 6.46106              |
| EIF4G1             | 0.425993             |
| ESR1               | 2.20931 *            |
| FADD               | 1.400649 *           |
| FAS                | 2.571388             |
| GAA                | -1.03225             |
| GABARAP            | 1.671774             |
| GABARAPL1          | 2.332196             |
| GABARAPL2          | 1.60599 *            |
| HDAC1              | 1.176462 *           |
| HDAC6              | 0.487185             |
| HGS                | 2.144028 *           |
| HSP90AA1           | 0.639545             |

## Supplementary Figure S2 (Continued)

| Gene Symbol | Fold Increase  |
|-------------|----------------|
| HSPA8       | 0.429459       |
| HTT         | 2.051518       |
| IFNG        | 2.831056       |
| IGF1        | 1.23986        |
| INS         | 1.37751        |
| IRGM        | 0.934947       |
| LAMP1       | 1.546296 *     |
| MAP1LC3A    | 2.064182       |
| MAP1LC3B    | 3.946444 *     |
| MAPK14      | 1.421552       |
| MAPK8       | 2.847527 *     |
| MTOR        | 0.799862       |
| NFKB1       | 2.880899       |
| NPC1        | 1.935098 *     |
| PIK3C3      | 2.166117 *     |
| PIK3CG      | 1.143554 (n=2) |
| PIK3R4      | 1.498895       |
| PRKAA1      | 2.404048 *     |
| PTEN        | 1.306894       |
| RAB24       | 2.394636 *     |
| RB1         | -0.99779       |
| RGS19       | 1.128973 *     |
| RPS6KB1     | 2.475376 *     |
| SNCA        | 2.195009 *     |
| SQSTM1      | 4.75271 *      |
| TGFB1       | 1.496329       |
| TGM2        | 0.108419       |
| TMEM74      | 0.830013       |
| TNF         | 5.010585       |
| TNFSF10     | 0.295698       |
| TP53        | 2.500337       |
| ULK1        | 2.098623       |
| ULK2        | 4.396573 *     |
| UVRAG       | 3.006331 *     |
| WIPI1       | 5.581288 *     |

**Supplementary Figure S2: Real-time PCR profiling of 84 human autophagic genes upon PE treatment.** Gene expression of 84 human autophagic genes in SY5Y cells treated with DMSO or 300 $\mu$ g/ml PE for 24h. The fold increase shown in the table is the average of at least 3 independent experiments. Genes whose expression are significantly down-regulated or up-regulated are indicated with the asterisk symbol \* (p <0.05).

## Supplementary Figure S3

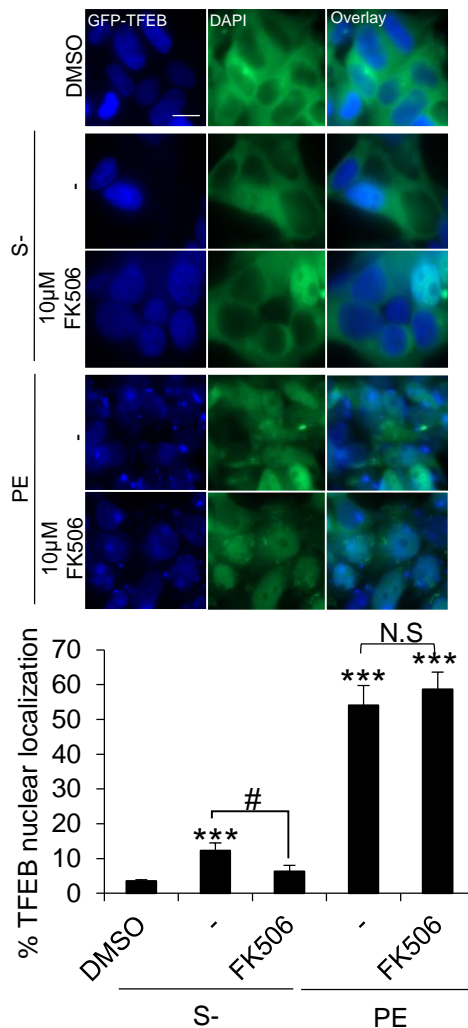

**Supplementary Figure S3: PE modulates TFEB nuclear localization independent of calcineurin.** Top: Fluorescence images depicting spatial localization of GFP-TFEB in GFP-TFEB SY5Y stable cells treated with DMSO, starved (S-), or treated with 300 μg/ml PE in the absence or presence of 10 μM calcineurin inhibitor FK506 for 16h. Nuclei were stained with DAPI. At least 100 cells from random fields were analyzed for each condition. All values are mean + S.E.M (n=3). Differences against DMSO, S- or PE are significant at \*\*\*p<0.005 and # p<0.05. N.S.=Non-significant. Scale bar, 10 μm.

# Supplementary Figure S4

**a**

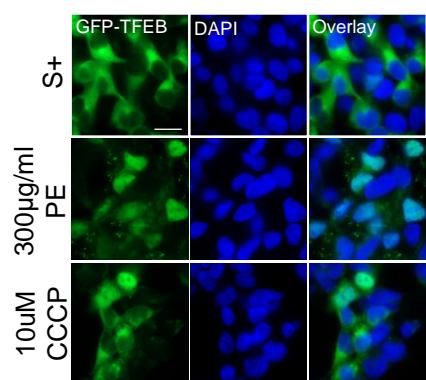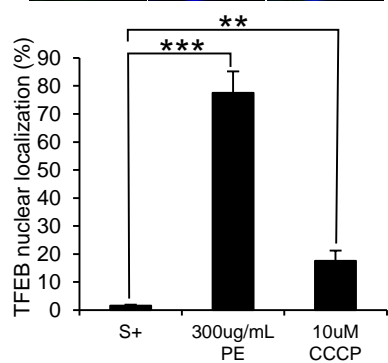

**b**

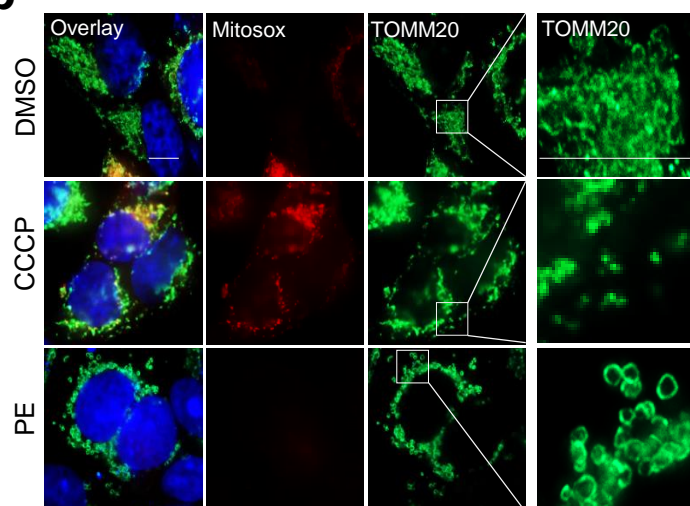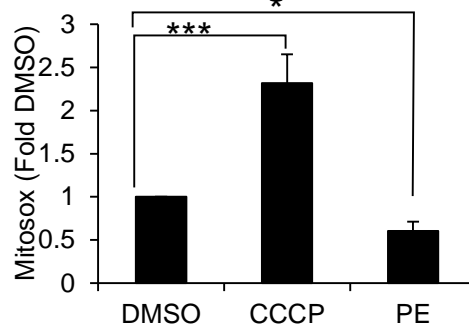

**c**

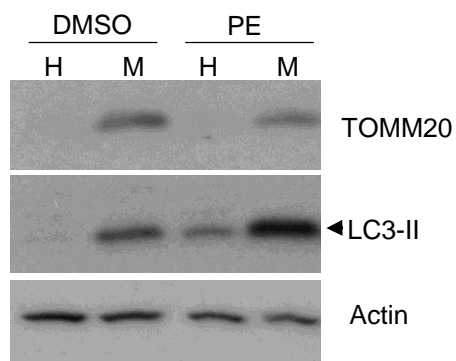

**d**

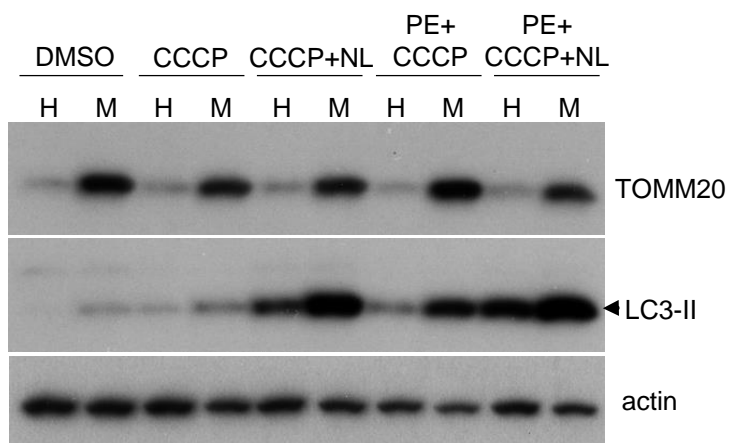

**e**

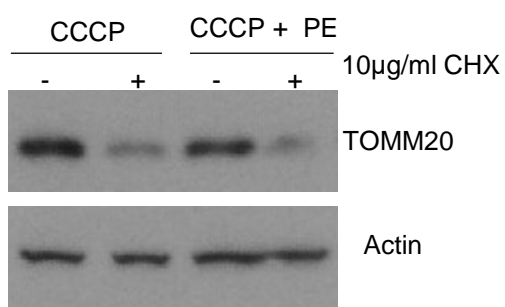

**Supplementary Figure S4: (a) CCCP induces TFEB nuclear localization.** Left: Fluorescence images depicting spatial localization of GFP-TFEB in GFP-TFEB SY5Y stable cells treated with DMSO, 300µg/ml PE or 10µM CCCP for 24h. Bottom: Quantification of percentage of cells containing nuclear-localized GFP-TFEB. **(b) PE-induced “donut” mitochondria has lowered mitochondrial ROS levels.** Top: Immunofluorescence images of Mitosox and TOMM20 staining in SY5Y cells treated with DMSO, 10µM CCCP and 300µg/ml PE for 16h. Smaller inlets show the close-up view of mitochondrial morphology under the different treatment conditions. Bottom: Quantification of Mitosox intensity level per cell area, expressed as fold change against DMSO. At least 100 cells from random fields were analyzed for TFEB nuclear localization, and at least 30 cells for Mitosox assay. Nuclei were stained with DAPI. Scale bar is 10µm unless otherwise stated. **(c-d) PE treatment enhances the presence of LC3-II in isolated mitochondria both basally and upon CCCP-induced stress.** (c) Immunoblots of TOMM20 and LC3 in total cell homogenate (H) and isolated mitochondrial fraction (M) prepared from SY5Y cells treated with DMSO or 300µg/ml PE 16h. (d) Immunoblots of TOMM20 and LC3 in total cell homogenate (H) and isolated mitochondrial fraction (M) in SY5Y cells treated with DMSO, 10µM CCCP alone or with lysosomal inhibitor (NL), and 10µM CCCP supplemented with 300µg/ml PE with or with lysosomal inhibitor (NL) for 16h. **(e) Cycloheximide treatment reduces mitochondrial TOMM20 protein synthesis.** Immunoblot of TOMM20 protein levels in SY5Y cells untreated or treated with 10µg/ml cycloheximide in the presence of 10µM CCCP alone or 10µM CCCP supplemented with 300 µg/ml PE for 12h. . All values are mean + S.E.M (n=3). Differences against S+ or DMSO PE are significant at \*p<0.05, \*\*p<0.01 and \*\*\* p<0.005.

## Supplementary Figure S5

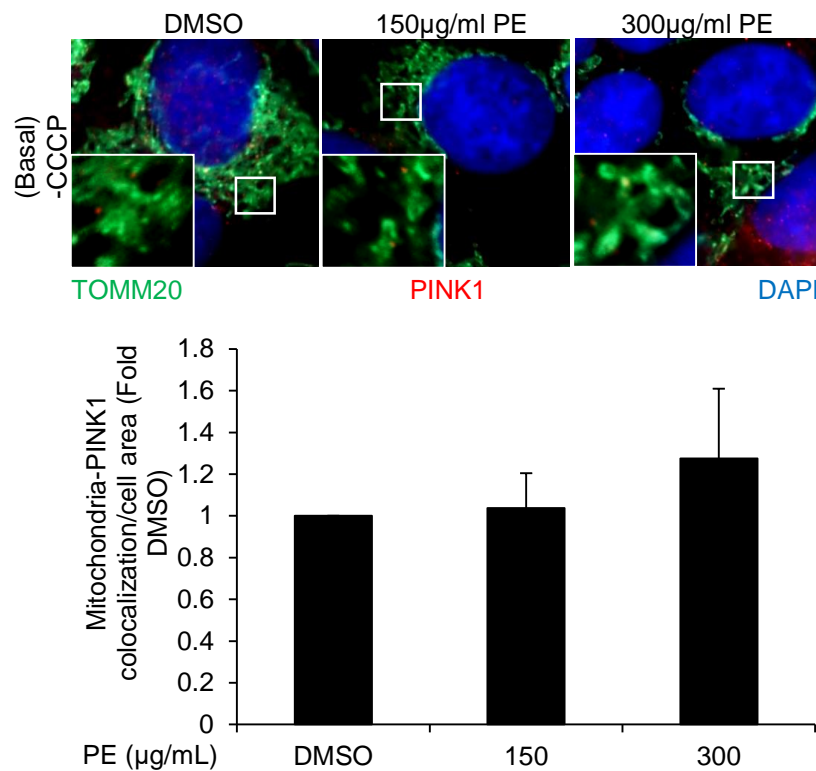

**Supplementary Figure S5: PE does not induce PINK1 recruitment to the mitochondria under basal condition.** Top: Immunofluorescence images of TOMM20 and PINK1 colocalization in SY5Y cells treated with DMSO, 150 or 300 µg/ml PE for 16h. Smaller inlets show close-up views of TOMM20 and PINK1 colocalization. Bottom: Quantification of TOMM20 and PINK1 colocalization per cell area, expressed as fold change against DMSO. 20 cells from random fields were analyzed for the colocalization. Nuclei were stained with DAPI. All values are mean + S.E.M (n=3).



# Supplementary Figure S6

**a**

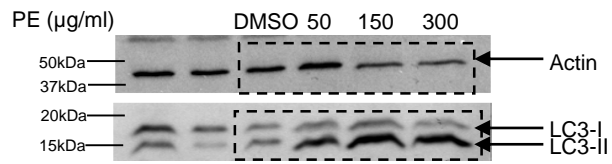

**b**

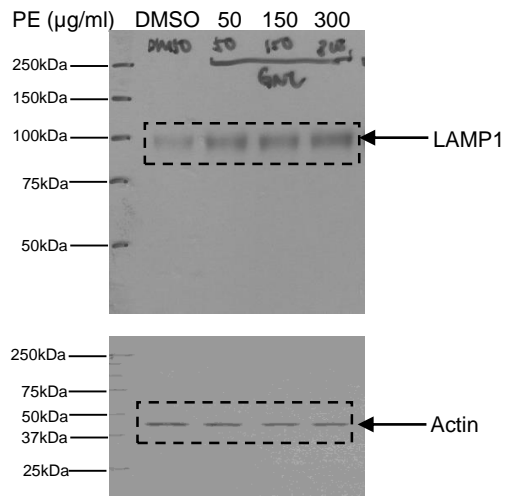

**f**

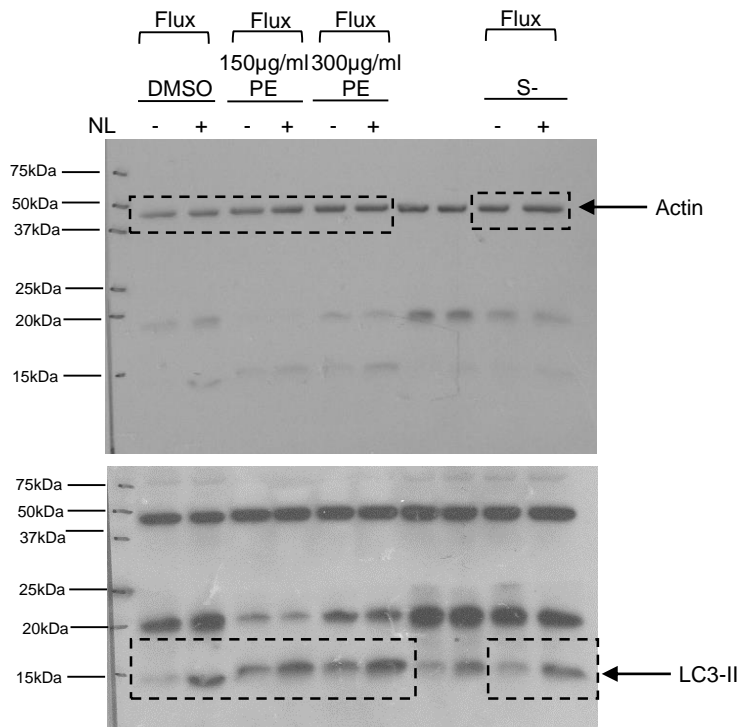

Supplementary Figure S6: Full-length blots corresponding to Fig. 1a, 1b and 1f.

# Supplementary Figure S7

**b**

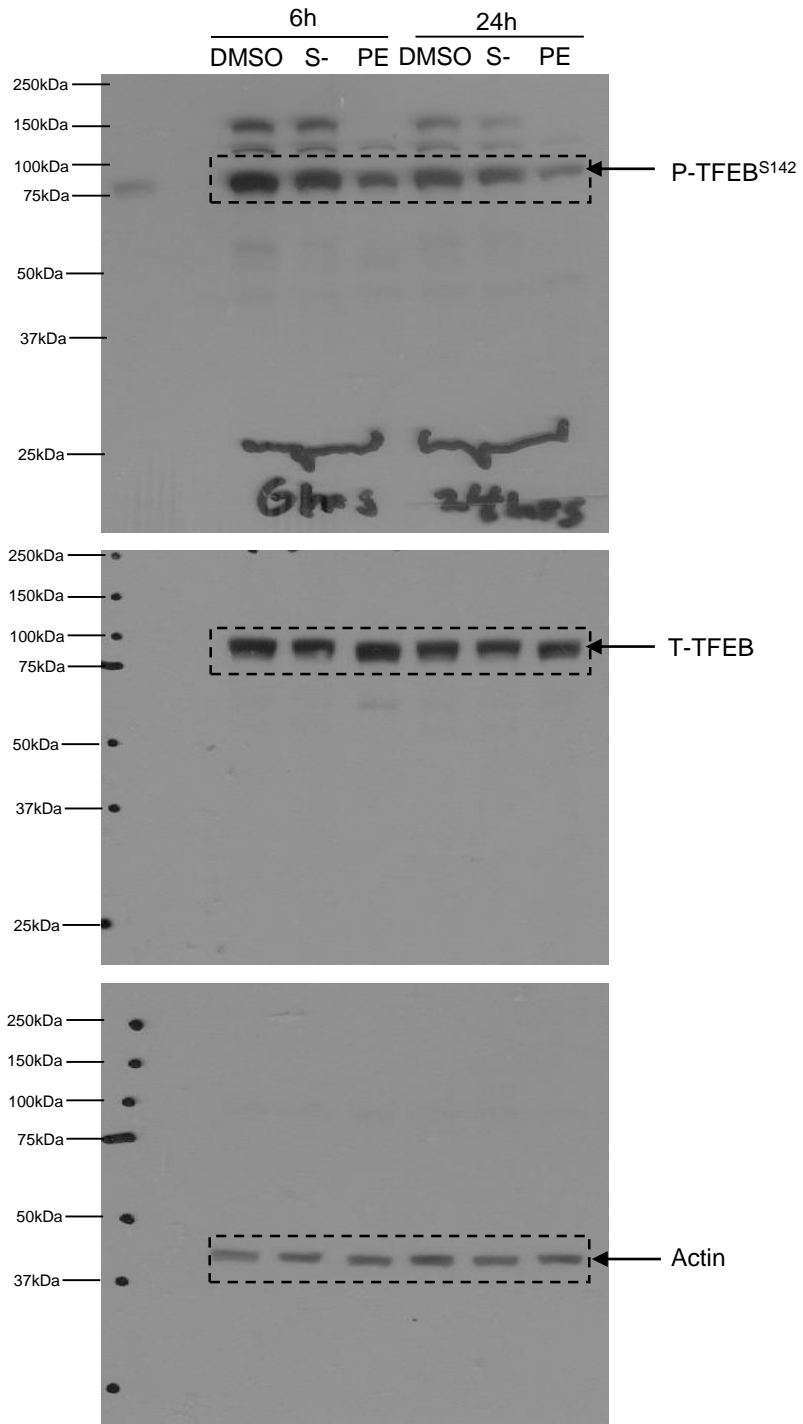

Supplementary Figure S7: Full-length blots corresponding to Fig.2b.

# Supplementary Figure S8

**a**

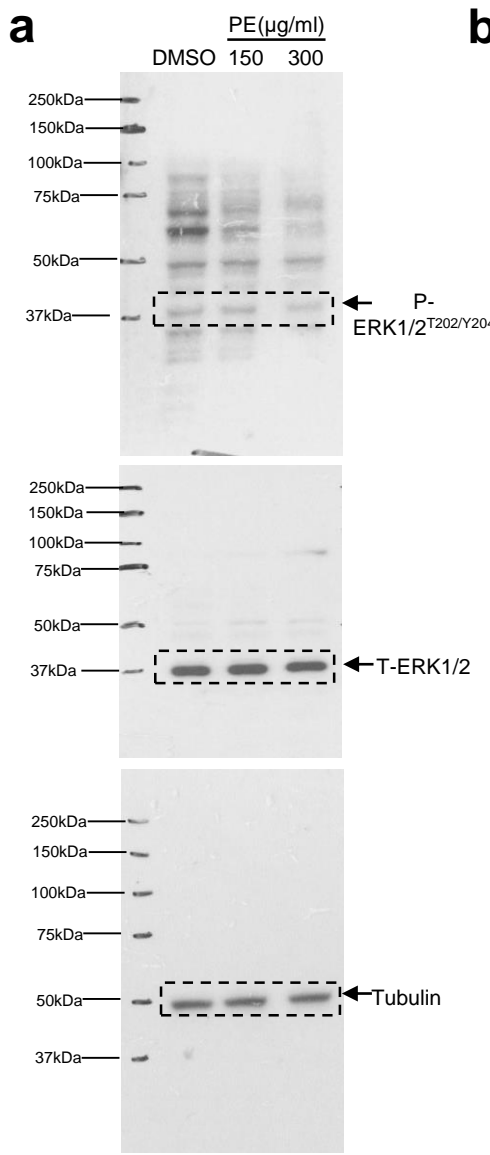

**b**

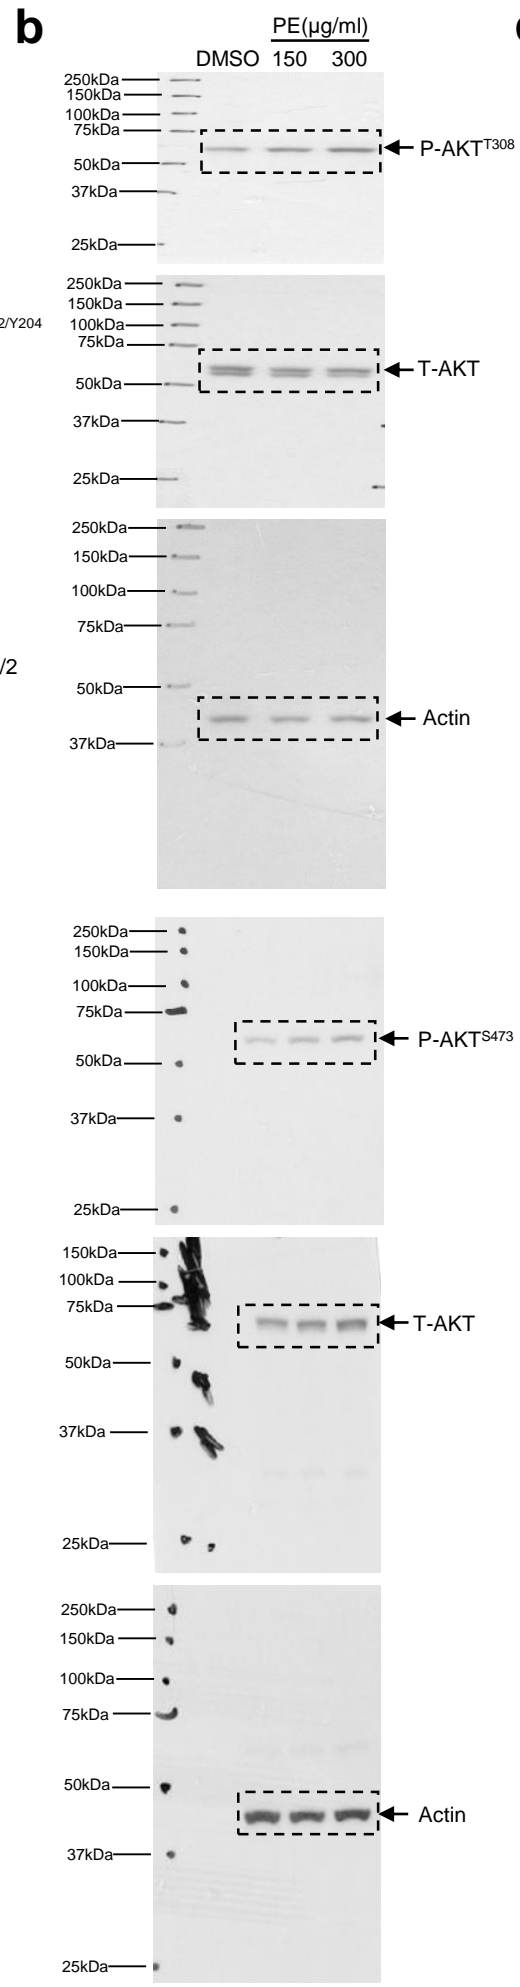

**c**

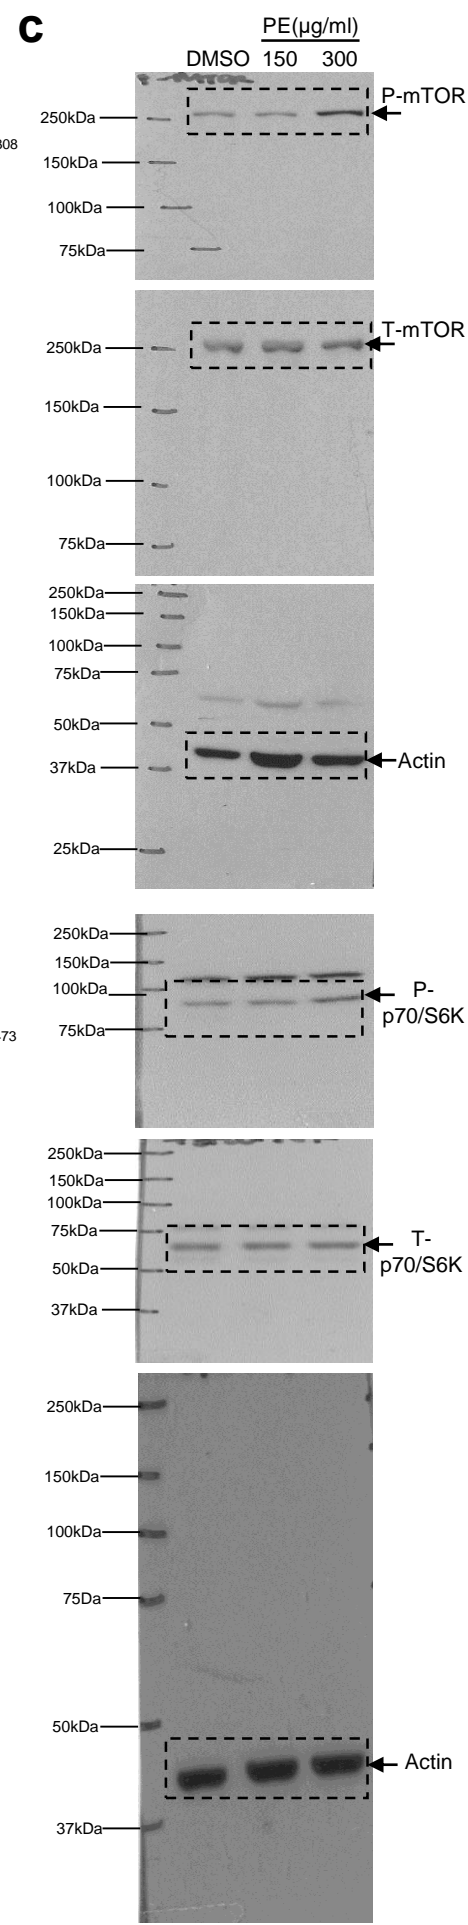

# Supplementary Figure S8 (continued)

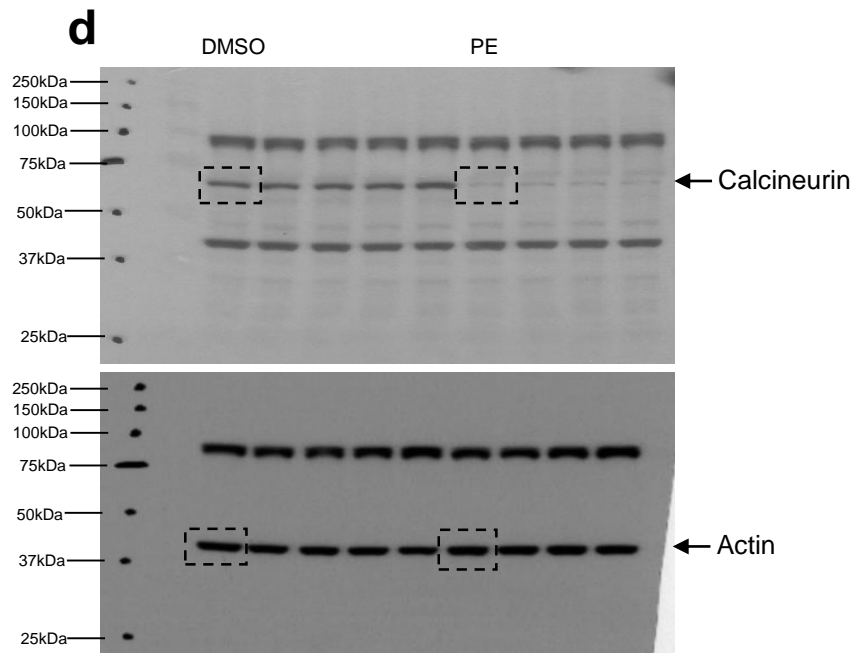

**Supplementary Figure S8: Full-length blots corresponding to Fig. 3a-d.**

# Supplementary Figure S9

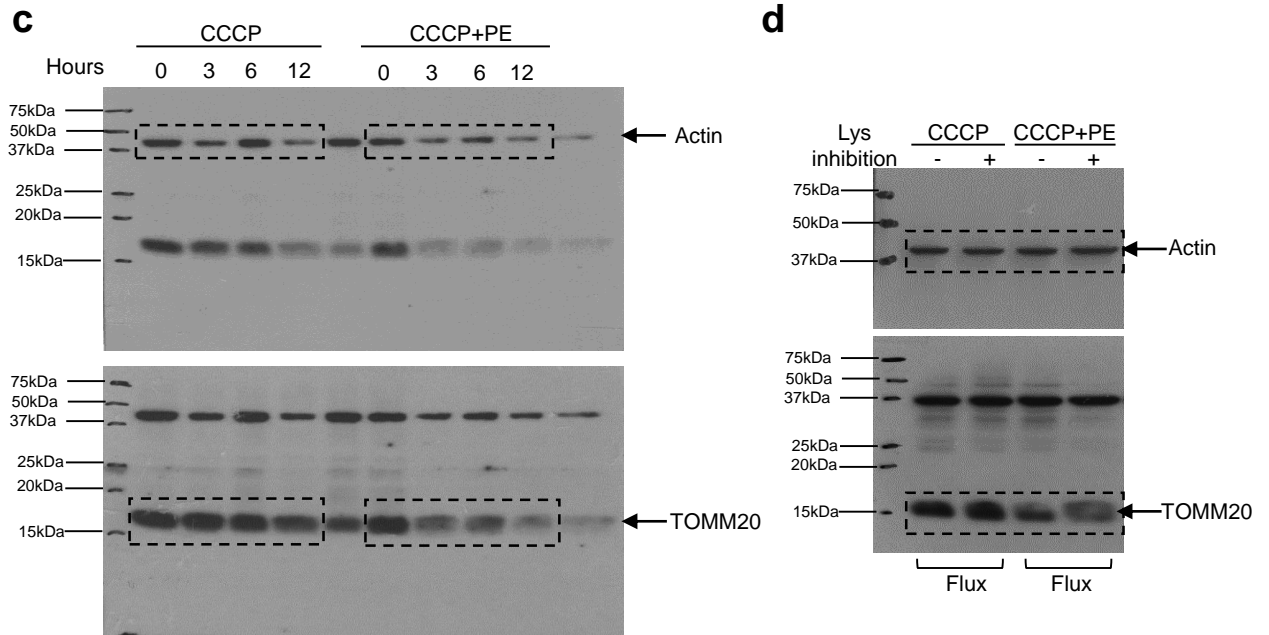

Supplementary Figure S9: Full-length blots corresponding to Fig. 4c and d.

# Supplementary Figure S10

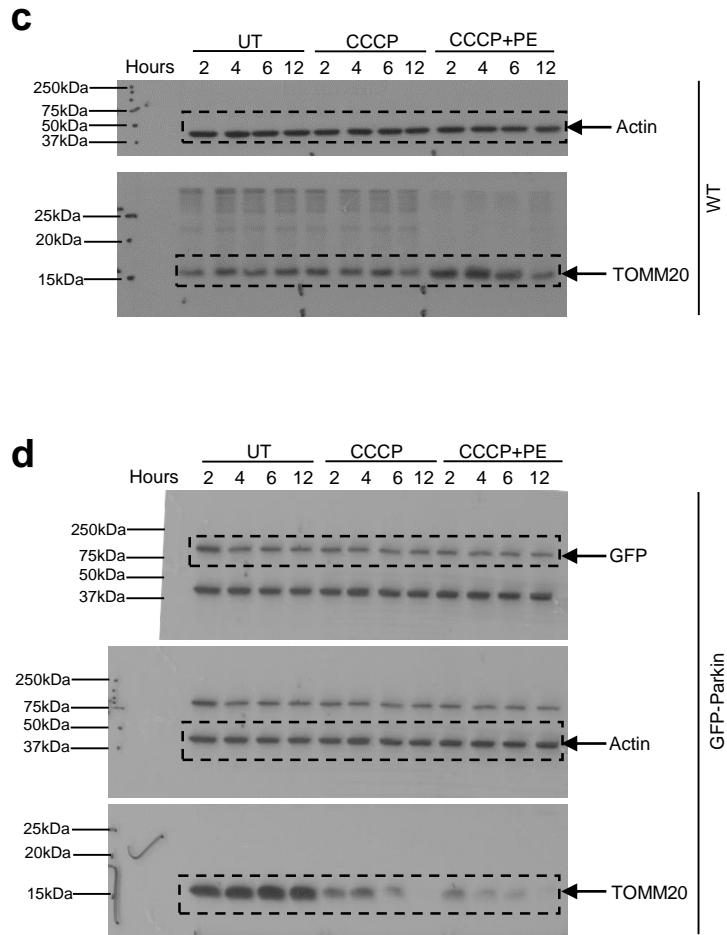

Supplementary Figure S10: Full-length blots corresponding to Fig. 5c and d.

# Supplementary Figure S11

**b**

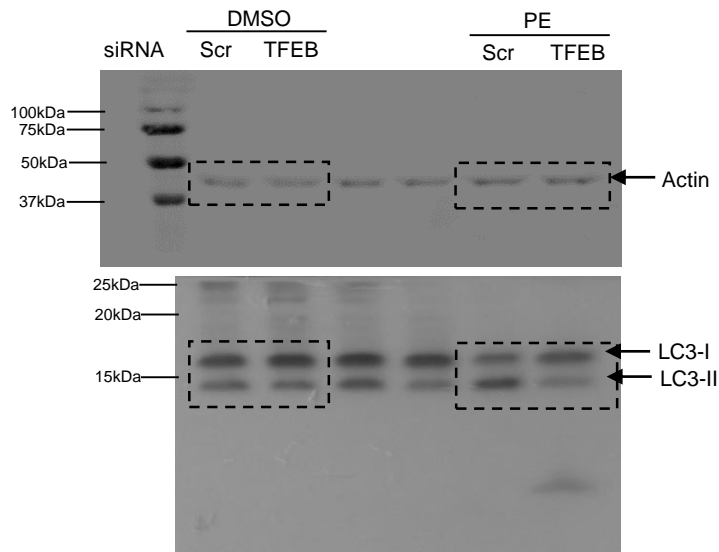

**c**

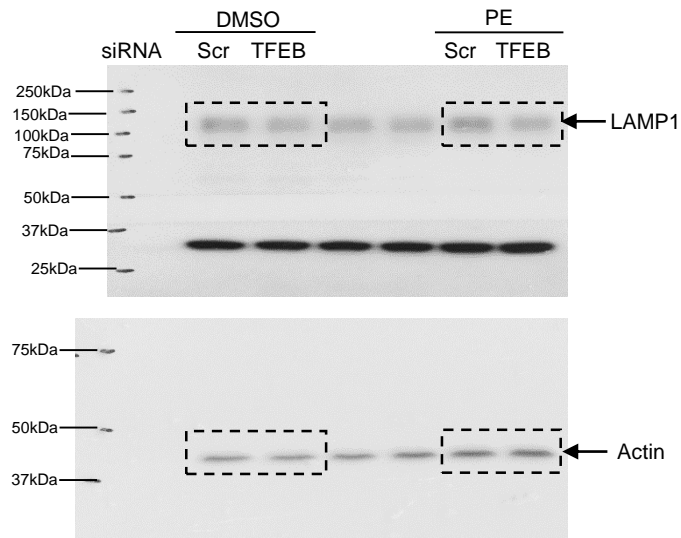

**e**

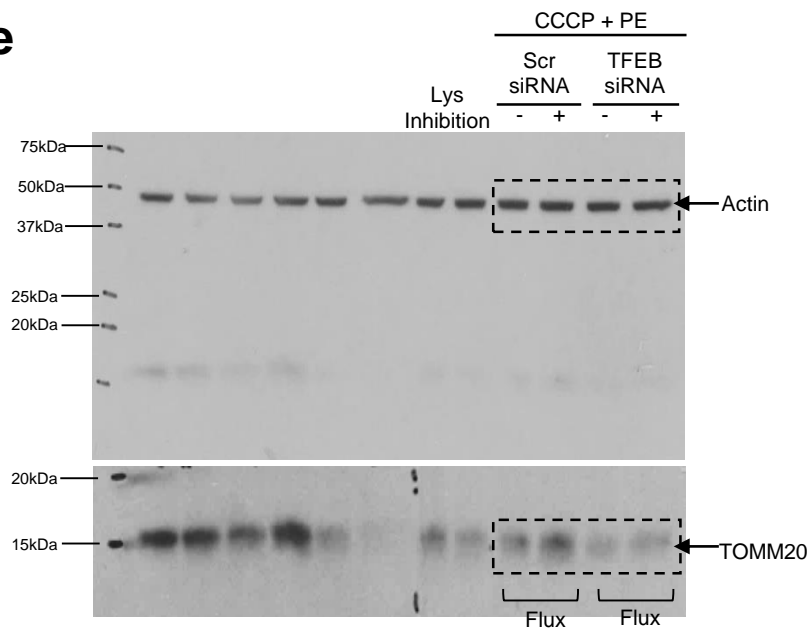

Supplementary Figure S11: Full-length blots corresponding to Fig. 7b-c and 7e.
